# Supplementary figures and images for: T‐MoCA: A valid phone screen for cognitive impairment in diverse community samples
Source: PubMed Central journal article supplement — Alzheimers Dement (Amst). 2021 Feb 5;13(1):e12144. doi: 10.1002/dad2.12144 (PMC7864219; doi:10.1002/dad2.12144), 2021-02-05

**Supplemental Figure 1. Consort Diagram Depicting Participant Flow**

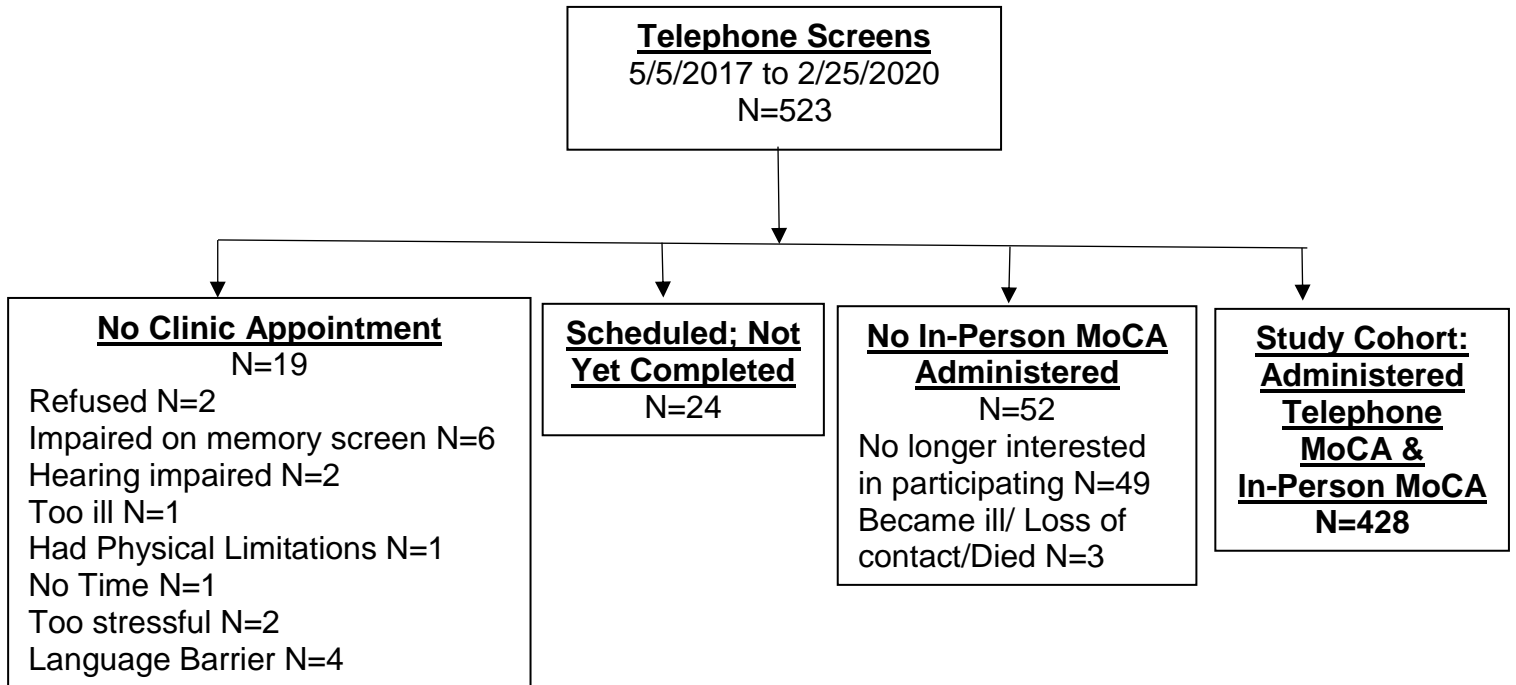

Supplement: DAD2-13-e12144-s002.pdf [file DAD2-13-e12144-s002.pdf]
